# Supplementary material for: Man the Fat Hunter: The Demise of Homo erectus and the Emergence of a New Hominin Lineage in the Middle Pleistocene (ca. 400 kyr) Levant
Source: PLoS One. 2011 Dec 9;6(12):e28689. doi: 10.1371/journal.pone.0028689 (PMC3235142; doi:10.1371/journal.pone.0028689)
Supplement: Table S3 — Comparison of relative contribution of fat and protein between two Levantine sites - GBY and Qesem Cave. (XLS) [file pone.0028689.s003.xls]

## Sheet: Supporting Table 03
Table S3. Comparison of relative contribution of fat and protein between two Levantine sites - GBY and Qesem Cave1
GESHER B'NOT YAACOV (GBY)									QESEM CAVE
Body Size Group	Representative animal	Weight (kg)	# NISP	Total calories	% of animals	% of total calories	Total fat calories		Body Size Group	Representative animal	Weight (kg)	# NISP	Total calories	% of animals	% of total calories	Total fat calories
GBY V-6									Qesem II
BSGA >1000 kg	Elephas antiquus	6952	15	6.44925e+07	0.0228659	0.589822	3.17544e+07		BSGA >1000 kg	Elephas antiquus
BSGB 1000 kg	Hippopothamus amph.	1383	15	13706115	0.0228659	0.125351	7.68811e+06		BSGB 1000 kg	Buffalo	753	107	4.98295e+07	0.105731	0.481033	2.45347e+07
BSGC 250-80 kg	Oryx	168.5	86	1.0075e+07	0.131098	0.0921416	4.22697e+06		BSGC 250-80 kg	Oryx	168.5	58	6.79475e+06	0.0573123	0.0655936	2.85075e+06
BSGD 80-40 kg	Kob	79.4	329	1.82423e+07	0.501524	0.166837	5.60873e+06		BSGD 80-40 kg	Kob	79.4	847	4.69643e+07	0.836957	0.453373	1.44395e+07
BSGE 40-15 kg	Thomson's Gazelle	21.9	211	2.8263e+06	0.321646	0.0258482	716303		BSGE 40-15 kg	Thomson's Gazelle	21.9	0	-	0		-
Total			656	1.09342e+08	1	1	4.99945e+07		Total			1012	1.03589e+08	1	1	4.1825e+07
Average per animal				166680			0.45723		Average per animal				102360			0.40376
GBY V-5									Qesem III
BSGA >1000 kg	Elephas antiquus	6952	10	4.2995e+07	0.0265252	0.595072	2.11696e+07		BSGA >1000 kg	Elephas antiquus
BSGB 1000 kg	Hippopothamus amph.	1383	12	10964892	0.0318302	0.15176	6.15049e+06		BSGB 1000 kg	Buffalo	753	188	8.7551e+07	0.145963	0.567928	4.31078e+07
BSGC 250-80 kg	Oryx	168.5	49	5.74039e+06	0.129973	0.0794498	2.40839e+06		BSGC 250-80 kg	Oryx	168.5	91	1.06607e+07	0.0706522	0.0691543	4.47272e+06
BSGD 80-40 kg	Kob	79.4	201	1.1145e+07	0.533156	0.154252	3.42661e+06		BSGD 80-40 kg	Kob	79.4	1009	5.59468e+07	0.783385	0.362918	1.72012e+07
BSGE 40-15 kg	Thomson's Gazelle	21.9	105	1406454	0.278515	0.019466	356454		BSGE 40-15 kg	Thomson's Gazelle	21.9	0	-	0		-
Total			377	7.22517e+07	1	1	3.35115e+07		Total			1288	1.54159e+08	1	1	6.47817e+07
Average per animal				191649			0.463816		Average per animal				119688			0.420228
GBY-JB									Qesem IV
BSGA >1000 kg	Elephas antiquus	6952	9	3.86955e+07	0.0224439	0.561542	1.90526e+07		BSGA >1000 kg	Elephas antiquus
BSGB 1000 kg	Hippopothamus amph.	1383	9	8223669	0.0224439	0.11934	4.61287e+06		BSGB 1000 kg	Buffalo	753	186	8.66196e+07	0.10814	0.489594	4.26492e+07
BSGC 250-80 kg	Oryx	168.5	94	1.10122e+07	0.234414	0.159807	4.62018e+06		BSGC 250-80 kg	Oryx	168.5	85	9.95782e+06	0.0494186	0.0562839	4.17782e+06
BSGD 80-40 kg	Kob	79.4	169	9.37068e+06	0.421446	0.135986	2.88108e+06		BSGD 80-40 kg	Kob	79.4	1449	8.03439e+07	0.842442	0.454122	2.47023e+07
BSGE 40-15 kg	Thomson's Gazelle	21.9	120	1607376	0.299252	0.0233259	407376		BSGE 40-15 kg	Thomson's Gazelle	21.9	0	-	0		-
Total			401	6.89094e+07	1	1	3.15741e+07		Total			1720	1.76921e+08	1	1	7.15292e+07
Average per animal				171844			0.458198		Average per animal				102861			0.4043
GBY-II-6									Qesem V
BSGA >1000 kg	Elephas antiquus	6952	13	5.58935e+07	0.058296	0.648192	2.75205e+07		BSGA >1000 kg	Elephas antiquus
BSGB 1000 kg	Hippopothamus amph.	1383	20	18274820	0.0896861	0.211932	1.02508e+07		BSGB 1000 kg	Buffalo	753	27	1.25738e+07	0.054326	0.308228	6.19101e+06
BSGC 250-80 kg	Oryx	168.5	52	6.09184e+06	0.233184	0.0706466	2.55584e+06		BSGC 250-80 kg	Oryx	168.5	35	4.10028e+06	0.0704225	0.100512	1.72028e+06
BSGD 80-40 kg	Kob	79.4	98	5.43388e+06	0.439462	0.0630163	1.67068e+06		BSGD 80-40 kg	Kob	79.4	435	24119793	0.875252	0.59126	7.41579e+06
BSGE 40-15 kg	Thomson's Gazelle	21.9	40	535792	0.179372	0.00621353	135792		BSGE 40-15 kg	Thomson's Gazelle	21.9	0	-	0		-
Total			223	8.62298e+07	1	1	4.21336e+07		Total			497	4.07939e+07	1	1	1.53271e+07
Average per animal				386681			0.48862		Average per animal				82080.2			0.37572
GBY - Average									Qesem - Average
BSGA >1000 kg	Elephas antiquus	6952	50	2.14975e+08	0.0297974	0.608327	1.05848e+08		BSGA >1000 kg	Elephas antiquus
BSGB 1000 kg	Hippopothamus amph.	1383	59	53910719	0.0351609	0.152554	3.02399e+07		BSGB 1000 kg	Buffalo	753	450	209563470	0.101055	0.470632	103183470
BSGC 250-80 kg	Oryx	168.5	286	3.35051e+07	0.170441	0.0948115	1.40571e+07		BSGC 250-80 kg	Oryx	168.5	223	2.61246e+07	0.0500786	0.05867	1.09606e+07
BSGD 80-40 kg	Kob	79.4	804	4.458e+07	0.479142	0.126151	1.37064e+07		BSGD 80-40 kg	Kob	79.4	3780	209592684	0.848866	0.470698	6.44407e+07
BSGE 40-15 kg	Thomson's Gazelle	21.9	479	6.41611e+06	0.285459	0.018156	1.62611e+06		BSGE 40-15 kg	Thomson's Gazelle	21.9	0	-	0		-
Total			1678	3.53387e+08	1	1	1.65478e+08		Total			4453	4.45281e+08	1	1	1.78585e+08
Average per animal				210600		%fat	0.468262		Average per animal				99995.7			0.401061
Table Notes
1. For references, see notes in Table 4 of the main text.
